# Supplementary material for: SARS-CoV-2 genomic diversity and the implications for qRT-PCR diagnostics and transmission
Source: HighWire-hosted journal article supplement (doi:10.1101/gr.268961.120), 2021-02-18
Supplement: Supplemental_File_S1.xlsx [file Supplemental_File_S1.xlsx]

## Sheet: Sheet1
Supplemental File S1. A table of recurring SV including position, sample count and the type of the SV.
Gene	Genomic position	Found in Samples	Sample frequency	SV Length	SV type
nsp1_leader_protein_pp1a_pp1ab	509	52	0.403101	-14	DEL
nsp1_leader_protein_pp1a_pp1ab	685	40	0.310078	-9	DEL
nsp3_Ac_TM1_ADRP_pp1a_pp1ab	4532	43	0.333333	-24	DEL
nsp4_TM2_pp1a_pp1ab	9541	32	0.248062	-32	DEL
nsp6_putative_transmembrane_domain_pp1a_pp1ab	11697	27	0.209302	-13	DEL
nsp15_endoRNAse_pp1ab	20292	31	0.24031	-29	DEL
S_protein	21740	64	0.496124	-39	DEL
S_protein	21984	33	0.255814	-9	DEL
S_protein	23558	54	0.418605	-22	DEL
S_protein	24014	36	0.27907	-15	DEL
M_protein	26562	26	0.20155	-11	DEL
M_protein	26779	58	0.449612	-41	DEL
N_protein	28406	27	0.209302	-9	DEL
N_protein	29067	34	0.263566	-14	DEL
orf1a	509	52	0.403101	-14	DEL
orf1a	685	40	0.310078	-9	DEL
orf1a	4532	43	0.333333	-24	DEL
orf1a	9541	32	0.248062	-32	DEL
orf1a	11697	27	0.209302	-13	DEL
orf1ab	509	52	0.403101	-14	DEL
orf1ab	685	40	0.310078	-9	DEL
orf1ab	4532	43	0.333333	-24	DEL
orf1ab	9541	32	0.248062	-32	DEL
orf1ab	11697	27	0.209302	-13	DEL
orf1ab	15022	26	0.20155	-18	DEL
orf1ab	20292	31	0.24031	-29	DEL
