# Supplementary material for: SARS-CoV-2 genomic diversity and the implications for qRT-PCR diagnostics and transmission
Source: HighWire-hosted journal article supplement (doi:10.1101/gr.268961.120), 2021-02-18
Supplement: Supplemental_File_S2.xlsx [file Supplemental_File_S2.xlsx]

## Sheet: Legend
Supplemental File S2: WHO detection probes and primers, Artic and Tomer Altman sequencing primers with SNP and iSNV occurrences indicated are summarized in this Excel file.

## Sheet: SARS_CoV2_iSNV
SARS-CoV-2 primers that overlap with iSNVs
Primer	Reference	Variant	Position	Primer start	Primer stop
ChinaCDC1_Primer_F	G	T	13349	13342	13362
ChinaCDC1_Primer_R	C	T	13452	13442	13460
ChinaCDC1_Probe_F	T	C	13380	13377	13404
ChinaCDC1_Probe_F	G	T	13393	13377	13404
ChinaCDC1_Probe_F	C	T	13377	13377	13404
ChinaCDC2_Primer_F	C	T	28890	28881	28902
ChinaCDC2_Primer_F	C	T	28893	28881	28902
ChinaCDC2_Primer_R	C	T	28961	28958	28979
Corman1_Primer_F	G	A	15448	15431	15452
Corman1_Primer_R	G	T	15517	15505	15530
Corman1_Probe_F	G	C	15493	15470	15494
Corman2_Primer_F	G	A	15448	15431	15452
Corman2_Primer_R	G	T	15517	15505	15530
Corman2_Probe_F	G	C	15493	15470	15494
France1_Primer_R	G	C	12795	12780	12797
France1_Primer_R	G	A	12793	12780	12797
France1_Primer_R	C	T	12781	12780	12797
France1_Probe_F	C	A	12732	12717	12737
France2_Primer_R	A	G	14172	14167	14186
France2_Primer_R	C	T	14183	14167	14186
France3_Primer_F	G	T	26273	26269	26294
France3_Primer_F	A	G	26269	26269	26294
France3_Primer_R	C	T	26366	26360	26381
France3_Primer_R	T	C	26374	26360	26381
France3_Primer_R	A	T	26377	26360	26381
France3_Primer_R	G	C	26363	26360	26381
France3_Primer_R	G	A	26375	26360	26381
France3_Probe_F	T	C	26354	26332	26357
France3_Probe_F	C	G	26340	26332	26357
HKU1_Primer_F	T	A	18783	18778	18797
HKU2_Primer_R	C	T	29247	29236	29254
HKU2_Probe_F	G	C	29195	29177	29196
Japan1_Primer_F	G	T	29140	29125	29144
Japan1_Primer_R	C	T	29272	29263	29282
Japan1_Primer_R	T	A	29278	29263	29282
Japan1_Primer_R	T	C	29278	29263	29282
Japan2_Primer_F	G	T	488	484	504
Japan2_Primer_F	C	T	504	484	504
Japan2_Primer_R	T	C	877	874	896
Japan2_Primer_R	A	G	894	874	896
Japan2_Primer_R	A	G	893	874	896
Japan2_Primer_R	G	T	885	874	896
Japan2_Probe_F	C	T	512	502	521
Japan2_Probe_F	G	T	509	502	521
Japan2_Probe_F	C	T	504	502	521
Japan3_Primer_F	G	T	509	492	510
Japan3_Primer_F	C	T	504	492	510
Japan3_Primer_R	G	T	824	816	837
Japan3_Primer_R	C	T	823	816	837
Japan3_Probe_R	C	T	823	805	823
Japan4_Primer_F	T	C	24371	24354	24377
Japan4_Primer_F	T	G	24375	24354	24377
Japan4_Primer_R	A	T	24895	24876	24900
Japan4_Primer_R	A	T	24891	24876	24900
Japan4_Probe_F	T	C	24371	24366	24386
Japan4_Probe_F	G	T	24386	24366	24386
Japan4_Probe_F	T	C	24380	24366	24386
Japan4_Probe_F	T	G	24375	24366	24386
Japan5_Primer_F	T	C	24371	24364	24384
Japan5_Primer_F	T	C	24380	24364	24384
Japan5_Primer_F	T	G	24375	24364	24384
Thailand1_Primer_F	A	G	28336	28320	28339
Thailand1_Primer_F	C	T	28320	28320	28339
Thailand1_Primer_R	A	C	28365	28358	28376
Thailand1_Primer_R	G	T	28371	28358	28376
Thailand1_Primer_R	A	G	28370	28358	28376
Thailand1_Probe_F	A	T	28342	28341	28356
USCDC1_Primer_F	T	C	28306	28287	28306
USCDC1_Primer_F	A	G	28294	28287	28306
USCDC1_Primer_R	A	G	28336	28335	28358
USCDC1_Primer_R	A	T	28342	28335	28358
USCDC1_Probe_F	C	T	28311	28309	28332
USCDC1_Probe_F	C	T	28320	28309	28332
USCDC1_Probe_F	C	T	28310	28309	28332
USCDC2_Primer_R	C	T	29218	29213	29230
USCDC2_Probe_F	G	C	29195	29188	29210
USCDC3_Primer_F	C	T	28698	28681	28702
USCDC3_Primer_R	C	T	28744	28732	28752
USCDC3_Primer_R	T	A	28749	28732	28752
USCDC3_Probe_F	C	T	28724	28704	28727
USCDC3_Probe_F	C	T	28717	28704	28727
Artic_nCoV-2019_1_LEFT	C	T	36	31	54
Artic_nCoV-2019_1_RIGHT	C	T	401	386	410
Artic_nCoV-2019_1_RIGHT	A	G	404	386	410
Artic_nCoV-2019_1_RIGHT	A	G	396	386	410
Artic_nCoV-2019_2_RIGHT	C	T	706	705	726
Artic_nCoV-2019_3_LEFT	T	C	646	643	664
Artic_nCoV-2019_3_LEFT	A	G	647	643	664
Artic_nCoV-2019_3_LEFT	C	T	657	643	664
Artic_nCoV-2019_4_LEFT	A	C	951	944	965
Artic_nCoV-2019_4_LEFT	G	A	945	944	965
Artic_nCoV-2019_5_LEFT	G	A	1244	1243	1264
Artic_nCoV-2019_5_RIGHT	T	A	1647	1624	1651
Artic_nCoV-2019_5_RIGHT	G	A	1636	1624	1651
Artic_nCoV-2019_6_LEFT	T	C	1582	1574	1595
Artic_nCoV-2019_6_LEFT	G	A	1589	1574	1595
Artic_nCoV-2019_6_LEFT	T	C	1591	1574	1595
Artic_nCoV-2019_6_LEFT	T	G	1592	1574	1595
Artic_nCoV-2019_6_RIGHT	T	C	1945	1943	1964
Artic_nCoV-2019_6_RIGHT	T	A	1963	1943	1964
Artic_nCoV-2019_6_RIGHT	T	G	1963	1943	1964
Artic_nCoV-2019_6_RIGHT	T	C	1963	1943	1964
Artic_nCoV-2019_7_LEFT	C	T	1884	1876	1897
Artic_nCoV-2019_7_LEFT	C	T	1887	1876	1897
Artic_nCoV-2019_7_LEFT_alt0	C	T	1884	1869	1890
Artic_nCoV-2019_7_LEFT_alt0	C	T	1887	1869	1890
Artic_nCoV-2019_7_RIGHT	T	C	2264	2248	2269
Artic_nCoV-2019_7_RIGHT	C	T	2252	2248	2269
Artic_nCoV-2019_7_RIGHT	C	T	2268	2248	2269
Artic_nCoV-2019_7_RIGHT	T	C	2257	2248	2269
Artic_nCoV-2019_7_RIGHT_alt5	T	C	2264	2243	2264
Artic_nCoV-2019_7_RIGHT_alt5	C	T	2252	2243	2264
Artic_nCoV-2019_7_RIGHT_alt5	T	C	2257	2243	2264
Artic_nCoV-2019_7_RIGHT_alt5	G	C	2243	2243	2264
Artic_nCoV-2019_8_LEFT	G	C	2185	2182	2205
Artic_nCoV-2019_8_LEFT	G	T	2199	2182	2205
Artic_nCoV-2019_8_RIGHT	C	T	2570	2569	2592
Artic_nCoV-2019_8_RIGHT	T	G	2572	2569	2592
Artic_nCoV-2019_9_LEFT	A	T	2521	2506	2529
Artic_nCoV-2019_9_LEFT	G	C	2516	2506	2529
Artic_nCoV-2019_9_LEFT	A	G	2524	2506	2529
Artic_nCoV-2019_9_LEFT_alt4	A	T	2521	2505	2528
Artic_nCoV-2019_9_LEFT_alt4	G	C	2516	2505	2528
Artic_nCoV-2019_9_LEFT_alt4	A	G	2524	2505	2528
Artic_nCoV-2019_9_RIGHT	C	T	2902	2883	2904
Artic_nCoV-2019_9_RIGHT	T	C	2889	2883	2904
Artic_nCoV-2019_9_RIGHT_alt2	C	T	2902	2881	2902
Artic_nCoV-2019_9_RIGHT_alt2	T	C	2889	2881	2902
Artic_nCoV-2019_10_LEFT	A	C	2846	2827	2850
Artic_nCoV-2019_10_LEFT	G	C	2833	2827	2850
Artic_nCoV-2019_10_RIGHT	G	C	3187	3184	3210
Artic_nCoV-2019_11_LEFT	C	T	3159	3145	3166
Artic_nCoV-2019_11_LEFT	G	C	3153	3145	3166
Artic_nCoV-2019_11_LEFT	T	C	3151	3145	3166
Artic_nCoV-2019_11_RIGHT	T	C	3524	3508	3531
Artic_nCoV-2019_11_RIGHT	G	T	3514	3508	3531
Artic_nCoV-2019_12_RIGHT	T	G	3843	3827	3853
Artic_nCoV-2019_12_RIGHT	G	A	3851	3827	3853
Artic_nCoV-2019_12_RIGHT	T	C	3833	3827	3853
Artic_nCoV-2019_13_LEFT	G	T	3782	3772	3795
Artic_nCoV-2019_13_LEFT	G	A	3774	3772	3795
Artic_nCoV-2019_13_LEFT	T	C	3789	3772	3795
Artic_nCoV-2019_13_RIGHT	G	T	4145	4143	4164
Artic_nCoV-2019_13_RIGHT	T	A	4147	4143	4164
Artic_nCoV-2019_13_RIGHT	T	C	4147	4143	4164
Artic_nCoV-2019_14_LEFT	C	T	4058	4055	4077
Artic_nCoV-2019_14_LEFT_alt4	C	T	4058	4045	4068
Artic_nCoV-2019_14_RIGHT	C	T	4433	4429	4450
Artic_nCoV-2019_14_RIGHT	C	T	4449	4429	4450
Artic_nCoV-2019_14_RIGHT	T	C	4441	4429	4450
Artic_nCoV-2019_14_RIGHT	T	C	4437	4429	4450
Artic_nCoV-2019_14_RIGHT_alt2	A	G	4424	4403	4424
Artic_nCoV-2019_15_LEFT	T	G	4302	4295	4321
Artic_nCoV-2019_15_LEFT_alt1	T	G	4302	4297	4322
Artic_nCoV-2019_15_RIGHT	G	T	4676	4675	4696
Artic_nCoV-2019_15_RIGHT_alt3	G	T	4676	4667	4689
Artic_nCoV-2019_16_LEFT	G	T	4656	4637	4658
Artic_nCoV-2019_16_LEFT	G	C	4642	4637	4658
Artic_nCoV-2019_16_LEFT	T	A	4639	4637	4658
Artic_nCoV-2019_16_RIGHT	T	C	5001	4996	5017
Artic_nCoV-2019_16_RIGHT	T	C	5016	4996	5017
Artic_nCoV-2019_16_RIGHT	C	A	5000	4996	5017
Artic_nCoV-2019_17_LEFT	T	A	4942	4940	4966
Artic_nCoV-2019_17_LEFT	T	C	4948	4940	4966
Artic_nCoV-2019_17_RIGHT	G	T	5300	5297	5321
Artic_nCoV-2019_17_RIGHT	A	G	5316	5297	5321
Artic_nCoV-2019_17_RIGHT	C	G	5310	5297	5321
Artic_nCoV-2019_17_RIGHT	A	G	5320	5297	5321
Artic_nCoV-2019_17_RIGHT	A	G	5321	5297	5321
Artic_nCoV-2019_18_LEFT	A	T	5257	5231	5259
Artic_nCoV-2019_18_RIGHT	G	C	5631	5621	5644
Artic_nCoV-2019_18_RIGHT	A	G	5638	5621	5644
Artic_nCoV-2019_18_RIGHT	C	T	5628	5621	5644
Artic_nCoV-2019_18_RIGHT_alt1	G	C	5631	5621	5643
Artic_nCoV-2019_18_RIGHT_alt1	A	G	5638	5621	5643
Artic_nCoV-2019_18_RIGHT_alt1	C	T	5628	5621	5643
Artic_nCoV-2019_19_LEFT	G	A	5579	5564	5586
Artic_nCoV-2019_19_LEFT	T	A	5577	5564	5586
Artic_nCoV-2019_19_LEFT	C	T	5583	5564	5586
Artic_nCoV-2019_19_LEFT	C	T	5575	5564	5586
Artic_nCoV-2019_19_RIGHT	C	G	5956	5933	5957
Artic_nCoV-2019_19_RIGHT	T	G	5947	5933	5957
Artic_nCoV-2019_19_RIGHT	C	T	5956	5933	5957
Artic_nCoV-2019_21_LEFT	C	T	6195	6168	6196
Artic_nCoV-2019_21_LEFT	A	T	6191	6168	6196
Artic_nCoV-2019_21_LEFT	G	T	6170	6168	6196
Artic_nCoV-2019_21_LEFT_alt2	C	T	6195	6169	6197
Artic_nCoV-2019_21_LEFT_alt2	A	T	6191	6169	6197
Artic_nCoV-2019_21_LEFT_alt2	G	T	6170	6169	6197
Artic_nCoV-2019_21_RIGHT	G	A	6537	6529	6550
Artic_nCoV-2019_21_RIGHT_alt0	G	A	6537	6527	6548
Artic_nCoV-2019_22_LEFT	G	T	6483	6467	6495
Artic_nCoV-2019_22_LEFT	A	T	6484	6467	6495
Artic_nCoV-2019_22_LEFT	A	G	6481	6467	6495
Artic_nCoV-2019_22_LEFT	T	C	6492	6467	6495
Artic_nCoV-2019_22_RIGHT	C	A	6870	6847	6873
Artic_nCoV-2019_22_RIGHT	T	G	6853	6847	6873
Artic_nCoV-2019_23_LEFT	G	T	6734	6719	6745
Artic_nCoV-2019_23_RIGHT	G	C	7116	7093	7117
Artic_nCoV-2019_23_RIGHT	T	C	7114	7093	7117
Artic_nCoV-2019_23_RIGHT	T	C	7096	7093	7117
Artic_nCoV-2019_23_RIGHT	G	T	7115	7093	7117
Artic_nCoV-2019_24_LEFT	T	C	7041	7036	7058
Artic_nCoV-2019_24_RIGHT	A	T	7399	7390	7415
Artic_nCoV-2019_24_RIGHT	C	T	7391	7390	7415
Artic_nCoV-2019_24_RIGHT	G	T	7400	7390	7415
Artic_nCoV-2019_24_RIGHT	T	A	7402	7390	7415
Artic_nCoV-2019_24_RIGHT	C	T	7392	7390	7415
Artic_nCoV-2019_24_RIGHT	C	A	7390	7390	7415
Artic_nCoV-2019_25_RIGHT	C	T	7686	7672	7694
Artic_nCoV-2019_27_LEFT	A	G	7966	7944	7968
Artic_nCoV-2019_27_LEFT	C	T	7945	7944	7968
Artic_nCoV-2019_27_LEFT	T	C	7963	7944	7968
Artic_nCoV-2019_27_LEFT	A	C	7965	7944	7968
Artic_nCoV-2019_27_RIGHT	A	G	8339	8320	8341
Artic_nCoV-2019_28_LEFT	G	T	8264	8250	8275
Artic_nCoV-2019_28_LEFT	T	C	8263	8250	8275
Artic_nCoV-2019_28_LEFT	A	T	8254	8250	8275
Artic_nCoV-2019_28_LEFT	G	C	8264	8250	8275
Artic_nCoV-2019_28_RIGHT	A	T	8661	8636	8661
Artic_nCoV-2019_29_LEFT	T	C	8608	8596	8619
Artic_nCoV-2019_29_RIGHT	G	T	8977	8955	8983
Artic_nCoV-2019_29_RIGHT	A	G	8957	8955	8983
Artic_nCoV-2019_31_LEFT	A	G	9210	9205	9226
Artic_nCoV-2019_31_LEFT	T	C	9208	9205	9226
Artic_nCoV-2019_31_LEFT	G	C	9216	9205	9226
Artic_nCoV-2019_31_LEFT	C	A	9223	9205	9226
Artic_nCoV-2019_31_RIGHT	G	C	9573	9558	9585
Artic_nCoV-2019_31_RIGHT	C	T	9565	9558	9585
Artic_nCoV-2019_31_RIGHT	T	C	9571	9558	9585
Artic_nCoV-2019_31_RIGHT	G	T	9572	9558	9585
Artic_nCoV-2019_32_LEFT	G	C	9494	9478	9502
Artic_nCoV-2019_32_LEFT	A	G	9492	9478	9502
Artic_nCoV-2019_32_LEFT	G	C	9480	9478	9502
Artic_nCoV-2019_33_LEFT	T	C	9787	9785	9806
Artic_nCoV-2019_33_LEFT	T	G	9804	9785	9806
Artic_nCoV-2019_33_LEFT	G	C	9800	9785	9806
Artic_nCoV-2019_33_LEFT	C	T	9801	9785	9806
Artic_nCoV-2019_34_LEFT	A	G	10095	10077	10099
Artic_nCoV-2019_34_LEFT	T	A	10082	10077	10099
Artic_nCoV-2019_34_RIGHT	T	A	10453	10438	10459
Artic_nCoV-2019_34_RIGHT	A	G	10451	10438	10459
Artic_nCoV-2019_35_LEFT	G	T	10368	10363	10384
Artic_nCoV-2019_35_LEFT	C	T	10373	10363	10384
Artic_nCoV-2019_35_LEFT	C	T	10369	10363	10384
Artic_nCoV-2019_35_RIGHT	G	T	10754	10738	10763
Artic_nCoV-2019_36_LEFT	T	A	10687	10667	10688
Artic_nCoV-2019_36_RIGHT	T	C	11049	11049	11074
Artic_nCoV-2019_36_RIGHT	C	T	11074	11049	11074
Artic_nCoV-2019_37_LEFT	C	T	11008	11000	11022
Artic_nCoV-2019_37_LEFT	C	T	11022	11000	11022
Artic_nCoV-2019_37_RIGHT	A	T	11393	11373	11394
Artic_nCoV-2019_38_LEFT	A	G	11319	11307	11331
Artic_nCoV-2019_38_LEFT	C	T	11328	11307	11331
Artic_nCoV-2019_38_RIGHT	A	G	11678	11669	11693
Artic_nCoV-2019_38_RIGHT	A	T	11678	11669	11693
Artic_nCoV-2019_39_LEFT	T	A	11566	11556	11584
Artic_nCoV-2019_39_LEFT	T	G	11566	11556	11584
Artic_nCoV-2019_39_LEFT	A	G	11567	11556	11584
Artic_nCoV-2019_40_RIGHT	G	A	12248	12235	12256
Artic_nCoV-2019_40_RIGHT	T	A	12236	12235	12256
Artic_nCoV-2019_41_LEFT	C	T	12119	12111	12133
Artic_nCoV-2019_41_LEFT	T	C	12125	12111	12133
Artic_nCoV-2019_41_RIGHT	C	T	12468	12466	12490
Artic_nCoV-2019_42_RIGHT	G	C	12795	12780	12802
Artic_nCoV-2019_42_RIGHT	G	T	12798	12780	12802
Artic_nCoV-2019_42_RIGHT	G	A	12793	12780	12802
Artic_nCoV-2019_42_RIGHT	C	T	12781	12780	12802
Artic_nCoV-2019_43_LEFT	C	A	12732	12711	12732
Artic_nCoV-2019_43_RIGHT	G	C	13082	13075	13096
Artic_nCoV-2019_43_RIGHT	T	C	13078	13075	13096
Artic_nCoV-2019_43_RIGHT	C	T	13077	13075	13096
Artic_nCoV-2019_44_RIGHT	T	C	13380	13379	13400
Artic_nCoV-2019_44_RIGHT	G	T	13393	13379	13400
Artic_nCoV-2019_44_RIGHT_alt0	T	C	13380	13364	13385
Artic_nCoV-2019_44_RIGHT_alt0	C	T	13377	13364	13385
Artic_nCoV-2019_44_RIGHT_alt0	A	T	13376	13364	13385
Artic_nCoV-2019_45_LEFT	T	C	13339	13320	13344
Artic_nCoV-2019_45_LEFT_alt2	G	A	13309	13308	13336
Artic_nCoV-2019_45_RIGHT	C	T	13680	13670	13699
Artic_nCoV-2019_45_RIGHT	A	T	13693	13670	13699
Artic_nCoV-2019_45_RIGHT_alt7	A	T	13666	13661	13689
Artic_nCoV-2019_45_RIGHT_alt7	C	T	13680	13661	13689
Artic_nCoV-2019_46_LEFT	T	C	13602	13600	13621
Artic_nCoV-2019_46_LEFT	C	T	13608	13600	13621
Artic_nCoV-2019_46_LEFT_alt1	C	T	13608	13603	13625
Artic_nCoV-2019_47_LEFT	T	C	13937	13919	13946
Artic_nCoV-2019_47_LEFT	T	C	13927	13919	13946
Artic_nCoV-2019_47_LEFT	C	T	13945	13919	13946
Artic_nCoV-2019_47_RIGHT	T	A	14285	14272	14299
Artic_nCoV-2019_47_RIGHT	T	A	14299	14272	14299
Artic_nCoV-2019_48_LEFT	G	T	14209	14208	14232
Artic_nCoV-2019_48_RIGHT	T	C	14589	14580	14601
Artic_nCoV-2019_49_RIGHT	A	G	14926	14899	14926
Artic_nCoV-2019_49_RIGHT	T	C	14921	14899	14926
Artic_nCoV-2019_49_RIGHT	G	T	14917	14899	14926
Artic_nCoV-2019_50_RIGHT	C	T	15237	15225	15246
Artic_nCoV-2019_51_LEFT	G	A	15178	15172	15193
Artic_nCoV-2019_51_LEFT	C	G	15182	15172	15193
Artic_nCoV-2019_51_LEFT	G	A	15190	15172	15193
Artic_nCoV-2019_51_LEFT	G	A	15191	15172	15193
Artic_nCoV-2019_51_RIGHT	C	T	15540	15539	15560
Artic_nCoV-2019_52_LEFT	G	C	15493	15482	15503
Artic_nCoV-2019_52_LEFT	G	T	15502	15482	15503
Artic_nCoV-2019_52_RIGHT	C	T	15883	15862	15886
Artic_nCoV-2019_53_LEFT	A	G	15841	15828	15851
Artic_nCoV-2019_53_RIGHT	G	T	16195	16187	16209
Artic_nCoV-2019_54_RIGHT	A	G	16499	16486	16510
Artic_nCoV-2019_55_LEFT	G	T	16440	16417	16444
Artic_nCoV-2019_55_RIGHT	A	G	16815	16805	16833
Artic_nCoV-2019_56_LEFT	C	T	16756	16749	16770
Artic_nCoV-2019_56_RIGHT	T	G	17136	17131	17152
Artic_nCoV-2019_57_LEFT	C	T	17084	17066	17087
Artic_nCoV-2019_57_RIGHT	C	T	17436	17431	17452
Artic_nCoV-2019_58_LEFT	G	T	17390	17382	17406
Artic_nCoV-2019_58_LEFT	T	A	17391	17382	17406
Artic_nCoV-2019_58_LEFT	C	T	17402	17382	17406
Artic_nCoV-2019_58_RIGHT	G	C	17741	17739	17761
Artic_nCoV-2019_59_LEFT	G	C	17695	17675	17697
Artic_nCoV-2019_59_RIGHT	C	T	18060	18037	18062
Artic_nCoV-2019_59_RIGHT	G	T	18049	18037	18062
Artic_nCoV-2019_59_RIGHT	A	G	18046	18037	18062
Artic_nCoV-2019_60_LEFT	G	T	17988	17967	17993
Artic_nCoV-2019_61_LEFT	C	T	18267	18254	18275
Artic_nCoV-2019_62_RIGHT	T	A	18963	18958	18979
Artic_nCoV-2019_63_RIGHT	G	T	19296	19276	19297
Artic_nCoV-2019_63_RIGHT	G	T	19288	19276	19297
Artic_nCoV-2019_63_RIGHT	T	G	19287	19276	19297
Artic_nCoV-2019_64_LEFT	T	C	19218	19205	19232
Artic_nCoV-2019_64_LEFT	T	G	19213	19205	19232
Artic_nCoV-2019_64_LEFT	T	G	19221	19205	19232
Artic_nCoV-2019_64_LEFT	T	C	19215	19205	19232
Artic_nCoV-2019_64_RIGHT	A	T	19614	19592	19616
Artic_nCoV-2019_64_RIGHT	A	G	19612	19592	19616
Artic_nCoV-2019_64_RIGHT	C	T	19602	19592	19616
Artic_nCoV-2019_65_LEFT	C	T	19554	19549	19570
Artic_nCoV-2019_65_RIGHT	T	C	19916	19912	19939
Artic_nCoV-2019_65_RIGHT	T	G	19920	19912	19939
Artic_nCoV-2019_66_LEFT	T	A	19860	19845	19866
Artic_nCoV-2019_66_LEFT	G	C	19858	19845	19866
Artic_nCoV-2019_66_LEFT	G	C	19861	19845	19866
Artic_nCoV-2019_66_LEFT	C	T	19854	19845	19866
Artic_nCoV-2019_66_LEFT	T	C	19848	19845	19866
Artic_nCoV-2019_66_RIGHT	G	C	20238	20232	20255
Artic_nCoV-2019_67_LEFT	A	T	20183	20173	20200
Artic_nCoV-2019_67_LEFT	G	C	20173	20173	20200
Artic_nCoV-2019_68_LEFT	A	T	20475	20473	20496
Artic_nCoV-2019_68_LEFT	C	T	20480	20473	20496
Artic_nCoV-2019_68_RIGHT	T	C	20874	20868	20890
Artic_nCoV-2019_69_LEFT	T	G	20809	20787	20813
Artic_nCoV-2019_69_LEFT	T	C	20802	20787	20813
Artic_nCoV-2019_69_RIGHT	T	A	21158	21147	21169
Artic_nCoV-2019_69_RIGHT	G	T	21159	21147	21169
Artic_nCoV-2019_69_RIGHT	T	C	21154	21147	21169
Artic_nCoV-2019_70_RIGHT	G	T	21452	21428	21455
Artic_nCoV-2019_70_RIGHT	G	C	21452	21428	21455
Artic_nCoV-2019_71_LEFT	C	T	21381	21358	21386
Artic_nCoV-2019_71_LEFT	C	T	21377	21358	21386
Artic_nCoV-2019_71_RIGHT	C	T	21721	21717	21743
Artic_nCoV-2019_72_LEFT	A	T	21672	21659	21682
Artic_nCoV-2019_72_LEFT	A	C	21675	21659	21682
Artic_nCoV-2019_72_LEFT	T	A	21679	21659	21682
Artic_nCoV-2019_72_RIGHT	A	G	22023	22014	22038
Artic_nCoV-2019_72_RIGHT	G	A	22030	22014	22038
Artic_nCoV-2019_73_LEFT	T	G	21976	21962	21990
Artic_nCoV-2019_73_LEFT	A	G	21979	21962	21990
Artic_nCoV-2019_73_RIGHT	G	T	22332	22325	22346
Artic_nCoV-2019_74_LEFT	C	T	22264	22263	22290
Artic_nCoV-2019_74_LEFT	C	T	22267	22263	22290
Artic_nCoV-2019_74_RIGHT	A	C	22628	22627	22650
Artic_nCoV-2019_74_RIGHT	A	T	22628	22627	22650
Artic_nCoV-2019_75_LEFT	C	T	22522	22517	22542
Artic_nCoV-2019_75_LEFT	C	T	22530	22517	22542
Artic_nCoV-2019_75_LEFT	T	A	22540	22517	22542
Artic_nCoV-2019_75_RIGHT	G	T	22894	22878	22903
Artic_nCoV-2019_76_LEFT	G	A	22799	22798	22819
Artic_nCoV-2019_76_LEFT	A	T	22798	22798	22819
Artic_nCoV-2019_76_LEFT_alt3	G	A	22799	22799	22821
Artic_nCoV-2019_76_LEFT_alt3	A	G	22821	22799	22821
Artic_nCoV-2019_76_RIGHT	C	T	23208	23193	23214
Artic_nCoV-2019_76_RIGHT	T	G	23212	23193	23214
Artic_nCoV-2019_76_RIGHT	C	T	23202	23193	23214
Artic_nCoV-2019_76_RIGHT_alt0	C	T	23208	23190	23212
Artic_nCoV-2019_76_RIGHT_alt0	T	G	23212	23190	23212
Artic_nCoV-2019_76_RIGHT_alt0	C	T	23202	23190	23212
Artic_nCoV-2019_77_RIGHT	T	C	23507	23501	23522
Artic_nCoV-2019_77_RIGHT	G	A	23517	23501	23522
Artic_nCoV-2019_78_LEFT	C	T	23462	23444	23466
Artic_nCoV-2019_78_RIGHT	G	T	23835	23823	23847
Artic_nCoV-2019_79_RIGHT	G	C	24154	24146	24169
Artic_nCoV-2019_79_RIGHT	T	C	24151	24146	24169
Artic_nCoV-2019_80_LEFT	G	T	24098	24079	24100
Artic_nCoV-2019_80_LEFT	G	C	24081	24079	24100
Artic_nCoV-2019_80_RIGHT	T	C	24464	24444	24467
Artic_nCoV-2019_80_RIGHT	A	T	24452	24444	24467
Artic_nCoV-2019_80_RIGHT	G	T	24445	24444	24467
Artic_nCoV-2019_80_RIGHT	T	A	24447	24444	24467
Artic_nCoV-2019_81_LEFT	T	C	24414	24392	24416
Artic_nCoV-2019_81_LEFT	C	T	24404	24392	24416
Artic_nCoV-2019_81_RIGHT	T	C	24769	24766	24789
Artic_nCoV-2019_82_LEFT	C	T	24715	24697	24721
Artic_nCoV-2019_83_LEFT	T	C	25001	24979	25003
Artic_nCoV-2019_83_LEFT	A	C	24994	24979	25003
Artic_nCoV-2019_83_RIGHT	A	G	25363	25348	25369
Artic_nCoV-2019_84_LEFT	C	T	25282	25280	25301
Artic_nCoV-2019_84_RIGHT	T	A	25661	25647	25673
Artic_nCoV-2019_84_RIGHT	G	T	25660	25647	25673
Artic_nCoV-2019_84_RIGHT	A	T	25657	25647	25673
Artic_nCoV-2019_84_RIGHT	T	G	25651	25647	25673
Artic_nCoV-2019_85_LEFT	G	T	25617	25602	25623
Artic_nCoV-2019_85_LEFT	A	C	25602	25602	25623
Artic_nCoV-2019_85_RIGHT	G	A	25991	25970	25994
Artic_nCoV-2019_85_RIGHT	T	G	25975	25970	25994
Artic_nCoV-2019_86_LEFT	G	T	25909	25903	25924
Artic_nCoV-2019_86_RIGHT	G	T	26314	26291	26315
Artic_nCoV-2019_86_RIGHT	G	T	26308	26291	26315
Artic_nCoV-2019_87_RIGHT	C	T	26571	26567	26590
Artic_nCoV-2019_87_RIGHT	C	T	26586	26567	26590
Artic_nCoV-2019_87_RIGHT	G	A	26574	26567	26590
Artic_nCoV-2019_88_LEFT	T	A	26524	26521	26542
Artic_nCoV-2019_88_LEFT	A	T	26536	26521	26542
Artic_nCoV-2019_88_RIGHT	C	T	26894	26891	26913
Artic_nCoV-2019_89_LEFT	C	T	26845	26836	26857
Artic_nCoV-2019_89_LEFT_alt2	C	T	26845	26839	26860
Artic_nCoV-2019_89_RIGHT	C	T	27211	27203	27227
Artic_nCoV-2019_89_RIGHT	G	T	27217	27203	27227
Artic_nCoV-2019_89_RIGHT	G	T	27214	27203	27227
Artic_nCoV-2019_89_RIGHT	T	C	27206	27203	27227
Artic_nCoV-2019_89_RIGHT_alt4	C	T	27211	27191	27215
Artic_nCoV-2019_89_RIGHT_alt4	G	T	27214	27191	27215
Artic_nCoV-2019_89_RIGHT_alt4	T	C	27206	27191	27215
Artic_nCoV-2019_90_RIGHT	G	A	27516	27512	27533
Artic_nCoV-2019_91_RIGHT	T	C	27837	27826	27854
Artic_nCoV-2019_92_LEFT	T	C	27792	27785	27808
Artic_nCoV-2019_92_LEFT	T	C	27795	27785	27808
Artic_nCoV-2019_92_RIGHT	A	T	28165	28146	28172
Artic_nCoV-2019_92_RIGHT	G	A	28167	28146	28172
Artic_nCoV-2019_93_LEFT	T	C	28082	28082	28104
Artic_nCoV-2019_93_LEFT	T	C	28088	28082	28104
Artic_nCoV-2019_94_LEFT	C	T	28411	28395	28416
Artic_nCoV-2019_94_LEFT	G	A	28396	28395	28416
Artic_nCoV-2019_94_RIGHT	G	T	28763	28757	28779
Artic_nCoV-2019_94_RIGHT	A	C	28777	28757	28779
Artic_nCoV-2019_95_LEFT	T	C	28678	28678	28699
Artic_nCoV-2019_95_LEFT	C	T	28698	28678	28699
Artic_nCoV-2019_95_RIGHT	G	C	29063	29042	29063
Artic_nCoV-2019_96_LEFT	G	T	28986	28986	29007
Artic_nCoV-2019_96_LEFT	C	T	28987	28986	29007
Artic_nCoV-2019_97_LEFT	G	T	29290	29289	29316
Artic_nCoV-2019_97_LEFT	A	G	29298	29289	29316
Artic_nCoV-2019_98_RIGHT	G	C	29853	29837	29866
Artic_nCoV-2019_98_RIGHT	C	G	29838	29837	29866
Artic_nCoV-2019_98_RIGHT	C	T	29837	29837	29866
Artic_nCoV-2019_98_RIGHT	T	A	29840	29837	29866
Artic_nCoV-2019_98_RIGHT	A	T	29865	29837	29866
Artic_nCoV-2019_98_RIGHT	A	G	29866	29837	29866

## Sheet: SARS_CoV2_SNP
SARS-CoV-2 primers that overlap with SNPs
Primer	Reference	Variant	Position	Primer start	Primer stop
ChinaCDC1_Primer_F	C	T	13358	13342	13362
ChinaCDC1_Primer_F	C	T	13356	13342	13362
ChinaCDC1_Primer_R	C	T	13458	13442	13460
ChinaCDC1_Probe_F	C	A	13377	13377	13404
ChinaCDC1_Probe_F	A	T	13401	13377	13404
ChinaCDC1_Probe_F	C	T	13384	13377	13404
ChinaCDC1_Probe_F	T	G	13402	13377	13404
ChinaCDC2_Primer_F	G	C	28883	28881	28902
ChinaCDC2_Primer_F	G	T	28881	28881	28902
ChinaCDC2_Primer_F	G	A	28881	28881	28902
ChinaCDC2_Primer_F	G	A	28882	28881	28902
ChinaCDC2_Primer_F	C	G	28896	28881	28902
ChinaCDC2_Primer_R	G	C	28960	28958	28979
ChinaCDC2_Primer_R	C	T	28969	28958	28979
ChinaCDC2_Primer_R	C	T	28977	28958	28979
ChinaCDC2_Primer_R	T	C	28976	28958	28979
ChinaCDC2_Primer_R	G	C	28968	28958	28979
Corman1_Primer_F	G	T	15438	15431	15452
Corman1_Primer_F	G	A	15439	15431	15452
Corman1_Primer_F	G	T	15444	15431	15452
Corman1_Probe_F	A	G	15477	15470	15494
Corman1_Probe_F	C	T	15480	15470	15494
Corman2_Primer_F	G	T	15438	15431	15452
Corman2_Primer_F	G	A	15439	15431	15452
Corman2_Primer_F	G	T	15444	15431	15452
Corman2_Probe_F	A	G	15477	15470	15494
Corman2_Probe_F	C	T	15480	15470	15494
France1_Primer_F	T	C	12696	12690	12707
France1_Primer_R	C	T	12786	12780	12797
France1_Primer_R	A	G	12787	12780	12797
France1_Primer_R	C	T	12781	12780	12797
France1_Primer_R	G	T	12793	12780	12797
France1_Probe_F	T	C	12722	12717	12737
France2_Primer_R	C	T	14184	14167	14186
France2_Primer_R	A	T	14185	14167	14186
France2_Primer_R	C	T	14183	14167	14186
France2_Probe_F	G	T	14122	14105	14123
France2_Probe_F	C	T	14120	14105	14123
France2_Probe_F	G	A	14118	14105	14123
France3_Primer_F	T	C	26294	26269	26294
France3_Primer_R	G	A	26372	26360	26381
France3_Probe_F	C	T	26333	26332	26357
France3_Probe_F	C	T	26353	26332	26357
France3_Probe_F	C	T	26340	26332	26357
France3_Probe_F	C	T	26351	26332	26357
France3_Probe_F	T	A	26354	26332	26357
HKU1_Primer_F	C	T	18788	18778	18797
HKU1_Primer_F	A	C	18789	18778	18797
HKU1_Primer_R	G	T	18907	18889	18909
HKU1_Primer_R	C	T	18904	18889	18909
HKU1_Primer_R	G	T	18898	18889	18909
HKU1_Primer_R	C	T	18894	18889	18909
HKU1_Probe_F	T	C	18863	18849	18872
HKU1_Probe_F	G	T	18859	18849	18872
Japan1_Primer_F	T	C	29129	29125	29144
Japan2_Primer_F	T	C	485	484	504
Japan2_Primer_F	T	A	490	484	504
Japan2_Primer_F	C	A	486	484	504
Japan2_Primer_R	C	T	875	874	896
Japan2_Primer_R	C	A	878	874	896
Japan2_Primer_R	A	G	895	874	896
Japan2_Primer_R	C	T	884	874	896
Japan2_Probe_F	A	G	507	502	521
Japan3_Primer_F	A	G	507	492	510
Japan3_Primer_R	T	C	818	816	837
Japan3_Primer_R	T	C	833	816	837
Japan3_Primer_R	G	C	837	816	837
Japan3_Primer_R	C	T	835	816	837
Japan3_Primer_R	C	T	823	816	837
Japan3_Primer_R	C	T	829	816	837
Japan3_Primer_R	C	T	832	816	837
Japan3_Probe_R	T	C	818	805	823
Japan3_Probe_R	C	T	823	805	823
Japan4_Primer_F	C	A	24358	24354	24377
Japan4_Primer_F	T	C	24376	24354	24377
Japan4_Primer_F	C	T	24372	24354	24377
Japan4_Primer_F	T	G	24364	24354	24377
Japan4_Primer_F	G	T	24368	24354	24377
Japan4_Primer_F	A	C	24367	24354	24377
Japan4_Primer_F	G	C	24368	24354	24377
Japan4_Primer_F	C	T	24370	24354	24377
Japan4_Primer_F	G	A	24357	24354	24377
Japan4_Primer_F	C	T	24374	24354	24377
Japan4_Primer_R	C	T	24896	24876	24900
Japan4_Primer_R	G	C	24893	24876	24900
Japan4_Primer_R	A	G	24877	24876	24900
Japan4_Probe_F	C	T	24382	24366	24386
Japan4_Probe_F	T	C	24376	24366	24386
Japan4_Probe_F	C	T	24372	24366	24386
Japan4_Probe_F	G	T	24368	24366	24386
Japan4_Probe_F	A	C	24367	24366	24386
Japan4_Probe_F	G	C	24368	24366	24386
Japan4_Probe_F	C	T	24381	24366	24386
Japan4_Probe_F	C	T	24378	24366	24386
Japan4_Probe_F	C	T	24370	24366	24386
Japan4_Probe_F	T	A	24380	24366	24386
Japan4_Probe_F	A	G	24383	24366	24386
Japan4_Probe_F	C	T	24374	24366	24386
Japan5_Primer_F	C	T	24382	24364	24384
Japan5_Primer_F	T	C	24376	24364	24384
Japan5_Primer_F	C	T	24372	24364	24384
Japan5_Primer_F	T	G	24364	24364	24384
Japan5_Primer_F	G	T	24368	24364	24384
Japan5_Primer_F	A	C	24367	24364	24384
Japan5_Primer_F	G	C	24368	24364	24384
Japan5_Primer_F	C	T	24381	24364	24384
Japan5_Primer_F	C	T	24378	24364	24384
Japan5_Primer_F	C	T	24370	24364	24384
Japan5_Primer_F	T	A	24380	24364	24384
Japan5_Primer_F	A	G	24383	24364	24384
Japan5_Primer_F	C	T	24374	24364	24384
Japan5_Primer_R	C	T	24844	24834	24856
Japan5_Probe_R	C	T	24844	24830	24848
Thailand1_Primer_F	C	T	28332	28320	28339
Thailand1_Primer_F	G	A	28325	28320	28339
Thailand1_Primer_F	G	T	28329	28320	28339
Thailand1_Primer_F	G	T	28337	28320	28339
Thailand1_Primer_F	G	T	28326	28320	28339
Thailand1_Primer_F	A	G	28338	28320	28339
Thailand1_Primer_F	G	C	28328	28320	28339
Thailand1_Primer_F	C	T	28331	28320	28339
Thailand1_Primer_R	G	A	28374	28358	28376
Thailand1_Primer_R	G	T	28368	28358	28376
Thailand1_Primer_R	A	G	28365	28358	28376
Thailand1_Primer_R	C	T	28369	28358	28376
Thailand1_Primer_R	G	T	28371	28358	28376
Thailand1_Primer_R	G	T	28362	28358	28376
Thailand1_Primer_R	G	A	28376	28358	28376
Thailand1_Primer_R	G	T	28373	28358	28376
Thailand1_Primer_R	G	A	28368	28358	28376
Thailand1_Primer_R	G	C	28361	28358	28376
Thailand1_Primer_R	G	A	28375	28358	28376
Thailand1_Primer_R	A	C	28359	28358	28376
Thailand1_Probe_F	C	A	28344	28341	28356
Thailand1_Probe_F	C	T	28344	28341	28356
Thailand1_Probe_F	A	T	28352	28341	28356
USCDC1_Primer_F	T	C	28297	28287	28306
USCDC1_Primer_F	C	T	28291	28287	28306
USCDC1_Primer_F	C	A	28289	28287	28306
USCDC1_Primer_F	A	C	28305	28287	28306
USCDC1_Primer_F	G	T	28300	28287	28306
USCDC1_Primer_F	A	G	28305	28287	28306
USCDC1_Primer_F	C	T	28290	28287	28306
USCDC1_Primer_R	T	C	28340	28335	28358
USCDC1_Primer_R	C	A	28344	28335	28358
USCDC1_Primer_R	C	T	28344	28335	28358
USCDC1_Primer_R	T	A	28340	28335	28358
USCDC1_Primer_R	G	T	28337	28335	28358
USCDC1_Primer_R	A	T	28352	28335	28358
USCDC1_Primer_R	A	G	28338	28335	28358
USCDC1_Probe_F	C	T	28315	28309	28332
USCDC1_Probe_F	C	A	28310	28309	28332
USCDC1_Probe_F	C	T	28311	28309	28332
USCDC1_Probe_F	C	T	28332	28309	28332
USCDC1_Probe_F	G	A	28325	28309	28332
USCDC1_Probe_F	G	T	28329	28309	28332
USCDC1_Probe_F	C	T	28310	28309	28332
USCDC1_Probe_F	G	T	28326	28309	28332
USCDC1_Probe_F	G	C	28328	28309	28332
USCDC1_Probe_F	C	T	28331	28309	28332
USCDC2_Primer_R	C	T	29218	29213	29230
USCDC2_Probe_F	C	T	29205	29188	29210
USCDC3_Primer_F	G	A	28682	28681	28702
USCDC3_Primer_R	A	C	28741	28732	28752
USCDC3_Primer_R	G	T	28747	28732	28752
USCDC3_Probe_F	C	T	28716	28704	28727
Artic_nCoV-2019_2_RIGHT	C	T	710	705	726
Artic_nCoV-2019_3_LEFT	C	T	643	643	664
Artic_nCoV-2019_3_RIGHT	T	C	1016	1005	1028
Artic_nCoV-2019_3_RIGHT	A	G	1015	1005	1028
Artic_nCoV-2019_4_LEFT	C	T	959	944	965
Artic_nCoV-2019_4_LEFT	C	T	955	944	965
Artic_nCoV-2019_4_LEFT	T	C	956	944	965
Artic_nCoV-2019_4_LEFT	T	A	961	944	965
Artic_nCoV-2019_4_LEFT	G	A	957	944	965
Artic_nCoV-2019_4_LEFT	T	C	946	944	965
Artic_nCoV-2019_4_RIGHT	G	A	1319	1313	1337
Artic_nCoV-2019_4_RIGHT	C	T	1314	1313	1337
Artic_nCoV-2019_4_RIGHT	A	C	1321	1313	1337
Artic_nCoV-2019_4_RIGHT	C	T	1326	1313	1337
Artic_nCoV-2019_4_RIGHT	T	A	1333	1313	1337
Artic_nCoV-2019_4_RIGHT	T	A	1334	1313	1337
Artic_nCoV-2019_4_RIGHT	A	G	1331	1313	1337
Artic_nCoV-2019_5_LEFT	G	A	1245	1243	1264
Artic_nCoV-2019_5_LEFT	A	G	1262	1243	1264
Artic_nCoV-2019_5_LEFT	T	G	1252	1243	1264
Artic_nCoV-2019_5_LEFT	C	T	1263	1243	1264
Artic_nCoV-2019_6_LEFT	G	A	1577	1574	1595
Artic_nCoV-2019_6_LEFT	T	A	1578	1574	1595
Artic_nCoV-2019_6_LEFT	G	T	1583	1574	1595
Artic_nCoV-2019_6_LEFT	G	T	1575	1574	1595
Artic_nCoV-2019_6_LEFT	G	C	1574	1574	1595
Artic_nCoV-2019_6_RIGHT	G	A	1944	1943	1964
Artic_nCoV-2019_6_RIGHT	G	T	1957	1943	1964
Artic_nCoV-2019_7_LEFT	G	T	1895	1876	1897
Artic_nCoV-2019_7_LEFT	G	T	1882	1876	1897
Artic_nCoV-2019_7_LEFT	T	C	1896	1876	1897
Artic_nCoV-2019_7_LEFT	C	T	1884	1876	1897
Artic_nCoV-2019_7_LEFT	C	T	1887	1876	1897
Artic_nCoV-2019_7_LEFT_alt0	G	A	1874	1869	1890
Artic_nCoV-2019_7_LEFT_alt0	G	T	1882	1869	1890
Artic_nCoV-2019_7_LEFT_alt0	C	T	1884	1869	1890
Artic_nCoV-2019_7_LEFT_alt0	C	T	1887	1869	1890
Artic_nCoV-2019_7_RIGHT	T	C	2266	2248	2269
Artic_nCoV-2019_7_RIGHT	A	G	2254	2248	2269
Artic_nCoV-2019_7_RIGHT_alt5	T	C	2244	2243	2264
Artic_nCoV-2019_7_RIGHT_alt5	A	G	2254	2243	2264
Artic_nCoV-2019_8_LEFT	C	T	2189	2182	2205
Artic_nCoV-2019_8_LEFT	G	A	2198	2182	2205
Artic_nCoV-2019_8_RIGHT	T	C	2587	2569	2592
Artic_nCoV-2019_8_RIGHT	G	C	2591	2569	2592
Artic_nCoV-2019_8_RIGHT	G	A	2582	2569	2592
Artic_nCoV-2019_8_RIGHT	G	T	2585	2569	2592
Artic_nCoV-2019_8_RIGHT	C	G	2574	2569	2592
Artic_nCoV-2019_8_RIGHT	A	T	2589	2569	2592
Artic_nCoV-2019_8_RIGHT	G	A	2577	2569	2592
Artic_nCoV-2019_8_RIGHT	T	A	2578	2569	2592
Artic_nCoV-2019_8_RIGHT	A	C	2590	2569	2592
Artic_nCoV-2019_8_RIGHT	T	C	2572	2569	2592
Artic_nCoV-2019_8_RIGHT	A	T	2573	2569	2592
Artic_nCoV-2019_8_RIGHT	A	G	2590	2569	2592
Artic_nCoV-2019_8_RIGHT	C	T	2574	2569	2592
Artic_nCoV-2019_8_RIGHT	A	G	2576	2569	2592
Artic_nCoV-2019_8_RIGHT	T	A	2584	2569	2592
Artic_nCoV-2019_8_RIGHT	G	A	2591	2569	2592
Artic_nCoV-2019_8_RIGHT	C	T	2592	2569	2592
Artic_nCoV-2019_8_RIGHT	G	A	2588	2569	2592
Artic_nCoV-2019_8_RIGHT	T	A	2575	2569	2592
Artic_nCoV-2019_9_RIGHT	G	A	2891	2883	2904
Artic_nCoV-2019_9_RIGHT_alt2	G	A	2891	2881	2902
Artic_nCoV-2019_10_LEFT	G	A	2840	2827	2850
Artic_nCoV-2019_11_LEFT	C	G	3157	3145	3166
Artic_nCoV-2019_11_LEFT	G	T	3145	3145	3166
Artic_nCoV-2019_11_LEFT	T	A	3154	3145	3166
Artic_nCoV-2019_11_LEFT	C	T	3165	3145	3166
Artic_nCoV-2019_11_LEFT	T	C	3160	3145	3166
Artic_nCoV-2019_11_RIGHT	C	T	3511	3508	3531
Artic_nCoV-2019_11_RIGHT	C	T	3525	3508	3531
Artic_nCoV-2019_11_RIGHT	G	T	3518	3508	3531
Artic_nCoV-2019_12_LEFT	A	G	3463	3461	3482
Artic_nCoV-2019_12_LEFT	G	A	3471	3461	3482
Artic_nCoV-2019_12_LEFT	A	G	3472	3461	3482
Artic_nCoV-2019_12_LEFT	G	T	3467	3461	3482
Artic_nCoV-2019_12_RIGHT	C	T	3832	3827	3853
Artic_nCoV-2019_12_RIGHT	A	G	3846	3827	3853
Artic_nCoV-2019_12_RIGHT	A	G	3830	3827	3853
Artic_nCoV-2019_13_LEFT	C	T	3792	3772	3795
Artic_nCoV-2019_13_LEFT	A	G	3778	3772	3795
Artic_nCoV-2019_13_LEFT	C	T	3784	3772	3795
Artic_nCoV-2019_13_LEFT	C	T	3787	3772	3795
Artic_nCoV-2019_13_LEFT	T	C	3793	3772	3795
Artic_nCoV-2019_13_LEFT	A	G	3786	3772	3795
Artic_nCoV-2019_13_RIGHT	G	T	4162	4143	4164
Artic_nCoV-2019_13_RIGHT	C	T	4158	4143	4164
Artic_nCoV-2019_13_RIGHT	G	T	4148	4143	4164
Artic_nCoV-2019_13_RIGHT	T	A	4150	4143	4164
Artic_nCoV-2019_14_LEFT	C	T	4069	4055	4077
Artic_nCoV-2019_14_LEFT	A	G	4060	4055	4077
Artic_nCoV-2019_14_LEFT_alt4	A	C	4050	4045	4068
Artic_nCoV-2019_14_LEFT_alt4	T	A	4053	4045	4068
Artic_nCoV-2019_14_LEFT_alt4	G	A	4047	4045	4068
Artic_nCoV-2019_14_LEFT_alt4	A	G	4060	4045	4068
Artic_nCoV-2019_14_LEFT_alt4	T	C	4053	4045	4068
Artic_nCoV-2019_14_RIGHT	A	G	4448	4429	4450
Artic_nCoV-2019_14_RIGHT	G	T	4444	4429	4450
Artic_nCoV-2019_14_RIGHT	G	A	4436	4429	4450
Artic_nCoV-2019_14_RIGHT_alt2	C	T	4423	4403	4424
Artic_nCoV-2019_14_RIGHT_alt2	A	C	4411	4403	4424
Artic_nCoV-2019_15_LEFT	C	T	4320	4295	4321
Artic_nCoV-2019_15_LEFT	C	T	4321	4295	4321
Artic_nCoV-2019_15_LEFT	A	G	4316	4295	4321
Artic_nCoV-2019_15_LEFT	C	A	4320	4295	4321
Artic_nCoV-2019_15_LEFT	G	T	4309	4295	4321
Artic_nCoV-2019_15_LEFT_alt1	C	T	4320	4297	4322
Artic_nCoV-2019_15_LEFT_alt1	C	T	4321	4297	4322
Artic_nCoV-2019_15_LEFT_alt1	A	G	4316	4297	4322
Artic_nCoV-2019_15_LEFT_alt1	C	A	4320	4297	4322
Artic_nCoV-2019_15_LEFT_alt1	G	T	4309	4297	4322
Artic_nCoV-2019_15_RIGHT	G	A	4678	4675	4696
Artic_nCoV-2019_15_RIGHT	C	T	4683	4675	4696
Artic_nCoV-2019_15_RIGHT	T	C	4684	4675	4696
Artic_nCoV-2019_15_RIGHT_alt3	G	A	4678	4667	4689
Artic_nCoV-2019_15_RIGHT_alt3	C	T	4683	4667	4689
Artic_nCoV-2019_15_RIGHT_alt3	C	T	4672	4667	4689
Artic_nCoV-2019_15_RIGHT_alt3	T	C	4684	4667	4689
Artic_nCoV-2019_15_RIGHT_alt3	C	T	4668	4667	4689
Artic_nCoV-2019_16_LEFT	C	T	4655	4637	4658
Artic_nCoV-2019_16_LEFT	A	G	4638	4637	4658
Artic_nCoV-2019_16_LEFT	G	T	4649	4637	4658
Artic_nCoV-2019_16_LEFT	T	A	4639	4637	4658
Artic_nCoV-2019_16_LEFT	T	C	4654	4637	4658
Artic_nCoV-2019_16_RIGHT	T	C	5014	4996	5017
Artic_nCoV-2019_16_RIGHT	G	T	5017	4996	5017
Artic_nCoV-2019_16_RIGHT	C	T	5007	4996	5017
Artic_nCoV-2019_16_RIGHT	C	T	5005	4996	5017
Artic_nCoV-2019_16_RIGHT	C	T	5000	4996	5017
Artic_nCoV-2019_17_LEFT	G	A	4951	4940	4966
Artic_nCoV-2019_17_LEFT	C	T	4940	4940	4966
Artic_nCoV-2019_17_LEFT	C	T	4947	4940	4966
Artic_nCoV-2019_17_LEFT	C	A	4943	4940	4966
Artic_nCoV-2019_17_LEFT	A	G	4956	4940	4966
Artic_nCoV-2019_18_LEFT	C	T	5239	5231	5259
Artic_nCoV-2019_18_LEFT	A	G	5235	5231	5259
Artic_nCoV-2019_18_LEFT	C	A	5239	5231	5259
Artic_nCoV-2019_18_LEFT	C	A	5241	5231	5259
Artic_nCoV-2019_18_LEFT	G	C	5233	5231	5259
Artic_nCoV-2019_18_LEFT_alt2	A	G	5277	5258	5287
Artic_nCoV-2019_18_RIGHT	C	T	5622	5621	5644
Artic_nCoV-2019_18_RIGHT	C	T	5643	5621	5644
Artic_nCoV-2019_18_RIGHT	A	G	5637	5621	5644
Artic_nCoV-2019_18_RIGHT_alt1	C	T	5622	5621	5643
Artic_nCoV-2019_18_RIGHT_alt1	C	T	5643	5621	5643
Artic_nCoV-2019_18_RIGHT_alt1	A	G	5637	5621	5643
Artic_nCoV-2019_19_LEFT	T	C	5573	5564	5586
Artic_nCoV-2019_19_LEFT	A	G	5570	5564	5586
Artic_nCoV-2019_19_LEFT	G	T	5572	5564	5586
Artic_nCoV-2019_19_LEFT	C	T	5575	5564	5586
Artic_nCoV-2019_19_RIGHT	G	T	5950	5933	5957
Artic_nCoV-2019_19_RIGHT	T	G	5941	5933	5957
Artic_nCoV-2019_19_RIGHT	C	T	5934	5933	5957
Artic_nCoV-2019_19_RIGHT	A	C	5937	5933	5957
Artic_nCoV-2019_20_LEFT	C	T	5893	5868	5894
Artic_nCoV-2019_20_LEFT	C	T	5884	5868	5894
Artic_nCoV-2019_20_LEFT	G	T	5880	5868	5894
Artic_nCoV-2019_20_LEFT	G	A	5880	5868	5894
Artic_nCoV-2019_20_LEFT	C	T	5886	5868	5894
Artic_nCoV-2019_20_LEFT	C	T	5869	5868	5894
Artic_nCoV-2019_20_RIGHT	G	A	6266	6248	6272
Artic_nCoV-2019_20_RIGHT	C	T	6255	6248	6272
Artic_nCoV-2019_20_RIGHT	A	G	6248	6248	6272
Artic_nCoV-2019_20_RIGHT	C	T	6267	6248	6272
Artic_nCoV-2019_20_RIGHT	A	C	6248	6248	6272
Artic_nCoV-2019_21_LEFT	C	T	6195	6168	6196
Artic_nCoV-2019_21_LEFT	C	T	6190	6168	6196
Artic_nCoV-2019_21_LEFT_alt2	C	T	6195	6169	6197
Artic_nCoV-2019_21_LEFT_alt2	C	T	6190	6169	6197
Artic_nCoV-2019_21_RIGHT	G	T	6532	6529	6550
Artic_nCoV-2019_21_RIGHT	C	T	6539	6529	6550
Artic_nCoV-2019_21_RIGHT	C	T	6543	6529	6550
Artic_nCoV-2019_21_RIGHT_alt0	G	T	6532	6527	6548
Artic_nCoV-2019_21_RIGHT_alt0	C	T	6539	6527	6548
Artic_nCoV-2019_21_RIGHT_alt0	C	T	6543	6527	6548
Artic_nCoV-2019_22_LEFT	T	C	6469	6467	6495
Artic_nCoV-2019_22_LEFT	C	T	6487	6467	6495
Artic_nCoV-2019_22_LEFT	A	G	6474	6467	6495
Artic_nCoV-2019_22_RIGHT	C	T	6861	6847	6873
Artic_nCoV-2019_23_LEFT	A	T	6731	6719	6745
Artic_nCoV-2019_23_LEFT	G	C	6742	6719	6745
Artic_nCoV-2019_23_LEFT	C	T	6740	6719	6745
Artic_nCoV-2019_23_LEFT	C	T	6723	6719	6745
Artic_nCoV-2019_23_LEFT	C	T	6730	6719	6745
Artic_nCoV-2019_23_LEFT	C	T	6720	6719	6745
Artic_nCoV-2019_23_RIGHT	A	T	7094	7093	7117
Artic_nCoV-2019_23_RIGHT	C	T	7105	7093	7117
Artic_nCoV-2019_23_RIGHT	C	T	7093	7093	7117
Artic_nCoV-2019_23_RIGHT	C	T	7095	7093	7117
Artic_nCoV-2019_23_RIGHT	T	G	7106	7093	7117
Artic_nCoV-2019_24_LEFT	C	G	7056	7036	7058
Artic_nCoV-2019_24_LEFT	C	T	7047	7036	7058
Artic_nCoV-2019_24_LEFT	G	C	7053	7036	7058
Artic_nCoV-2019_24_LEFT	A	T	7050	7036	7058
Artic_nCoV-2019_24_LEFT	T	A	7057	7036	7058
Artic_nCoV-2019_24_LEFT	C	G	7051	7036	7058
Artic_nCoV-2019_24_RIGHT	C	T	7390	7390	7415
Artic_nCoV-2019_24_RIGHT	C	T	7392	7390	7415
Artic_nCoV-2019_24_RIGHT	C	T	7398	7390	7415
Artic_nCoV-2019_24_RIGHT	G	T	7393	7390	7415
Artic_nCoV-2019_25_LEFT	C	T	7321	7306	7332
Artic_nCoV-2019_25_LEFT	T	C	7322	7306	7332
Artic_nCoV-2019_25_LEFT	G	C	7312	7306	7332
Artic_nCoV-2019_25_RIGHT	T	C	7672	7672	7694
Artic_nCoV-2019_25_RIGHT	G	T	7675	7672	7694
Artic_nCoV-2019_25_RIGHT	G	A	7684	7672	7694
Artic_nCoV-2019_26_LEFT	C	T	7644	7627	7651
Artic_nCoV-2019_26_LEFT	G	A	7641	7627	7651
Artic_nCoV-2019_26_RIGHT	T	A	8004	7998	8019
Artic_nCoV-2019_26_RIGHT	T	C	8004	7998	8019
Artic_nCoV-2019_26_RIGHT	A	C	8001	7998	8019
Artic_nCoV-2019_27_LEFT	C	T	7945	7944	7968
Artic_nCoV-2019_27_RIGHT	T	A	8336	8320	8341
Artic_nCoV-2019_27_RIGHT	C	T	8327	8320	8341
Artic_nCoV-2019_27_RIGHT	T	A	8329	8320	8341
Artic_nCoV-2019_27_RIGHT	G	C	8333	8320	8341
Artic_nCoV-2019_27_RIGHT	C	T	8320	8320	8341
Artic_nCoV-2019_27_RIGHT	C	T	8326	8320	8341
Artic_nCoV-2019_27_RIGHT	T	C	8323	8320	8341
Artic_nCoV-2019_28_LEFT	C	T	8266	8250	8275
Artic_nCoV-2019_28_LEFT	G	A	8274	8250	8275
Artic_nCoV-2019_29_RIGHT	A	G	8981	8955	8983
Artic_nCoV-2019_29_RIGHT	C	T	8964	8955	8983
Artic_nCoV-2019_29_RIGHT	C	T	8982	8955	8983
Artic_nCoV-2019_29_RIGHT	C	T	8956	8955	8983
Artic_nCoV-2019_29_RIGHT	T	A	8983	8955	8983
Artic_nCoV-2019_30_RIGHT	A	G	9259	9246	9271
Artic_nCoV-2019_30_RIGHT	C	T	9246	9246	9271
Artic_nCoV-2019_31_LEFT	G	C	9211	9205	9226
Artic_nCoV-2019_31_LEFT	C	T	9223	9205	9226
Artic_nCoV-2019_31_LEFT	C	T	9226	9205	9226
Artic_nCoV-2019_31_LEFT	T	C	9208	9205	9226
Artic_nCoV-2019_31_RIGHT	G	A	9572	9558	9585
Artic_nCoV-2019_31_RIGHT	C	T	9565	9558	9585
Artic_nCoV-2019_31_RIGHT	C	T	9561	9558	9585
Artic_nCoV-2019_31_RIGHT	T	C	9574	9558	9585
Artic_nCoV-2019_32_LEFT	G	T	9479	9478	9502
Artic_nCoV-2019_32_LEFT	A	G	9483	9478	9502
Artic_nCoV-2019_32_LEFT	C	T	9491	9478	9502
Artic_nCoV-2019_32_RIGHT	C	T	9836	9835	9858
Artic_nCoV-2019_32_RIGHT	T	C	9853	9835	9858
Artic_nCoV-2019_32_RIGHT	C	T	9857	9835	9858
Artic_nCoV-2019_32_RIGHT	T	C	9855	9835	9858
Artic_nCoV-2019_32_RIGHT	G	T	9856	9835	9858
Artic_nCoV-2019_33_LEFT	C	T	9803	9785	9806
Artic_nCoV-2019_33_LEFT	G	T	9802	9785	9806
Artic_nCoV-2019_33_RIGHT	C	T	10165	10147	10171
Artic_nCoV-2019_34_LEFT	T	C	10093	10077	10099
Artic_nCoV-2019_34_RIGHT	C	T	10449	10438	10459
Artic_nCoV-2019_34_RIGHT	C	T	10440	10438	10459
Artic_nCoV-2019_34_RIGHT	C	T	10450	10438	10459
Artic_nCoV-2019_35_LEFT	C	A	10376	10363	10384
Artic_nCoV-2019_35_RIGHT	C	T	10748	10738	10763
Artic_nCoV-2019_35_RIGHT	C	T	10755	10738	10763
Artic_nCoV-2019_35_RIGHT	A	G	10761	10738	10763
Artic_nCoV-2019_35_RIGHT	C	T	10741	10738	10763
Artic_nCoV-2019_35_RIGHT	T	C	10763	10738	10763
Artic_nCoV-2019_36_LEFT	T	C	10667	10667	10688
Artic_nCoV-2019_36_RIGHT	C	T	11067	11049	11074
Artic_nCoV-2019_36_RIGHT	G	T	11055	11049	11074
Artic_nCoV-2019_36_RIGHT	C	T	11074	11049	11074
Artic_nCoV-2019_36_RIGHT	G	C	11071	11049	11074
Artic_nCoV-2019_36_RIGHT	A	C	11061	11049	11074
Artic_nCoV-2019_37_LEFT	C	T	11020	11000	11022
Artic_nCoV-2019_37_LEFT	C	T	11003	11000	11022
Artic_nCoV-2019_37_LEFT	C	T	11008	11000	11022
Artic_nCoV-2019_37_RIGHT	G	T	11383	11373	11394
Artic_nCoV-2019_37_RIGHT	G	T	11376	11373	11394
Artic_nCoV-2019_37_RIGHT	A	G	11393	11373	11394
Artic_nCoV-2019_37_RIGHT	G	T	11378	11373	11394
Artic_nCoV-2019_38_RIGHT	C	T	11671	11669	11693
Artic_nCoV-2019_38_RIGHT	C	T	11674	11669	11693
Artic_nCoV-2019_38_RIGHT	C	T	11681	11669	11693
Artic_nCoV-2019_39_LEFT	C	A	11575	11556	11584
Artic_nCoV-2019_39_LEFT	G	A	11557	11556	11584
Artic_nCoV-2019_39_LEFT	C	T	11572	11556	11584
Artic_nCoV-2019_39_LEFT	G	T	11557	11556	11584
Artic_nCoV-2019_39_LEFT	C	T	11575	11556	11584
Artic_nCoV-2019_39_LEFT	C	T	11563	11556	11584
Artic_nCoV-2019_39_RIGHT	A	C	11935	11928	11949
Artic_nCoV-2019_39_RIGHT	C	T	11941	11928	11949
Artic_nCoV-2019_39_RIGHT	G	A	11937	11928	11949
Artic_nCoV-2019_40_LEFT	C	T	11866	11864	11889
Artic_nCoV-2019_40_LEFT	C	T	11878	11864	11889
Artic_nCoV-2019_40_LEFT	T	C	11883	11864	11889
Artic_nCoV-2019_40_RIGHT	C	T	12242	12235	12256
Artic_nCoV-2019_40_RIGHT	T	C	12244	12235	12256
Artic_nCoV-2019_40_RIGHT	C	T	12249	12235	12256
Artic_nCoV-2019_40_RIGHT	G	T	12243	12235	12256
Artic_nCoV-2019_40_RIGHT	T	C	12247	12235	12256
Artic_nCoV-2019_41_LEFT	C	T	12116	12111	12133
Artic_nCoV-2019_41_LEFT	C	T	12119	12111	12133
Artic_nCoV-2019_41_LEFT	C	T	12115	12111	12133
Artic_nCoV-2019_41_LEFT	A	G	12121	12111	12133
Artic_nCoV-2019_41_LEFT	T	C	12112	12111	12133
Artic_nCoV-2019_41_LEFT	G	A	12111	12111	12133
Artic_nCoV-2019_41_RIGHT	T	A	12480	12466	12490
Artic_nCoV-2019_41_RIGHT	C	T	12469	12466	12490
Artic_nCoV-2019_41_RIGHT	C	T	12473	12466	12490
Artic_nCoV-2019_41_RIGHT	A	T	12475	12466	12490
Artic_nCoV-2019_41_RIGHT	G	A	12478	12466	12490
Artic_nCoV-2019_41_RIGHT	A	G	12490	12466	12490
Artic_nCoV-2019_42_LEFT	G	C	12425	12418	12439
Artic_nCoV-2019_42_RIGHT	C	T	12786	12780	12802
Artic_nCoV-2019_42_RIGHT	A	G	12787	12780	12802
Artic_nCoV-2019_42_RIGHT	C	T	12781	12780	12802
Artic_nCoV-2019_42_RIGHT	G	T	12793	12780	12802
Artic_nCoV-2019_43_LEFT	T	C	12722	12711	12732
Artic_nCoV-2019_43_RIGHT	A	T	13087	13075	13096
Artic_nCoV-2019_44_LEFT	C	T	13019	13006	13027
Artic_nCoV-2019_44_LEFT	T	C	13006	13006	13027
Artic_nCoV-2019_44_LEFT_alt3	C	T	13019	13008	13029
Artic_nCoV-2019_44_RIGHT	C	T	13384	13379	13400
Artic_nCoV-2019_44_RIGHT_alt0	C	A	13377	13364	13385
Artic_nCoV-2019_44_RIGHT_alt0	C	T	13384	13364	13385
Artic_nCoV-2019_45_LEFT	C	T	13335	13320	13344
Artic_nCoV-2019_45_LEFT_alt2	C	T	13335	13308	13336
Artic_nCoV-2019_45_RIGHT	C	T	13694	13670	13699
Artic_nCoV-2019_45_RIGHT	A	G	13679	13670	13699
Artic_nCoV-2019_45_RIGHT	T	A	13686	13670	13699
Artic_nCoV-2019_45_RIGHT	G	T	13687	13670	13699
Artic_nCoV-2019_45_RIGHT	A	T	13693	13670	13699
Artic_nCoV-2019_45_RIGHT_alt7	C	T	13665	13661	13689
Artic_nCoV-2019_45_RIGHT_alt7	A	G	13679	13661	13689
Artic_nCoV-2019_45_RIGHT_alt7	T	A	13686	13661	13689
Artic_nCoV-2019_45_RIGHT_alt7	G	T	13687	13661	13689
Artic_nCoV-2019_46_LEFT	A	G	13616	13600	13621
Artic_nCoV-2019_46_LEFT	C	T	13603	13600	13621
Artic_nCoV-2019_46_LEFT	C	T	13620	13600	13621
Artic_nCoV-2019_46_LEFT	G	T	13617	13600	13621
Artic_nCoV-2019_46_LEFT	C	T	13608	13600	13621
Artic_nCoV-2019_46_LEFT_alt1	A	G	13616	13603	13625
Artic_nCoV-2019_46_LEFT_alt1	C	T	13603	13603	13625
Artic_nCoV-2019_46_LEFT_alt1	C	T	13620	13603	13625
Artic_nCoV-2019_46_LEFT_alt1	G	T	13617	13603	13625
Artic_nCoV-2019_46_LEFT_alt1	C	T	13608	13603	13625
Artic_nCoV-2019_46_RIGHT	G	A	13975	13963	13984
Artic_nCoV-2019_46_RIGHT	G	A	13966	13963	13984
Artic_nCoV-2019_46_RIGHT_alt2	G	A	13975	13962	13984
Artic_nCoV-2019_46_RIGHT_alt2	G	A	13966	13962	13984
Artic_nCoV-2019_47_LEFT	A	G	13928	13919	13946
Artic_nCoV-2019_47_LEFT	T	C	13929	13919	13946
Artic_nCoV-2019_47_LEFT	T	C	13932	13919	13946
Artic_nCoV-2019_47_LEFT	A	G	13943	13919	13946
Artic_nCoV-2019_47_LEFT	G	T	13921	13919	13946
Artic_nCoV-2019_47_LEFT	A	T	13922	13919	13946
Artic_nCoV-2019_47_RIGHT	G	T	14277	14272	14299
Artic_nCoV-2019_47_RIGHT	T	C	14295	14272	14299
Artic_nCoV-2019_48_LEFT	A	G	14224	14208	14232
Artic_nCoV-2019_48_LEFT	G	T	14229	14208	14232
Artic_nCoV-2019_48_RIGHT	T	C	14586	14580	14601
Artic_nCoV-2019_48_RIGHT	T	G	14590	14580	14601
Artic_nCoV-2019_48_RIGHT	C	T	14585	14580	14601
Artic_nCoV-2019_48_RIGHT	C	T	14583	14580	14601
Artic_nCoV-2019_48_RIGHT	G	T	14580	14580	14601
Artic_nCoV-2019_48_RIGHT	G	A	14593	14580	14601
Artic_nCoV-2019_49_LEFT	T	C	14562	14546	14570
Artic_nCoV-2019_49_LEFT	C	T	14554	14546	14570
Artic_nCoV-2019_49_RIGHT	A	G	14912	14899	14926
Artic_nCoV-2019_49_RIGHT	C	T	14925	14899	14926
Artic_nCoV-2019_49_RIGHT	T	G	14907	14899	14926
Artic_nCoV-2019_50_LEFT	C	T	14889	14866	14895
Artic_nCoV-2019_50_LEFT	T	C	14887	14866	14895
Artic_nCoV-2019_50_LEFT	G	T	14866	14866	14895
Artic_nCoV-2019_50_LEFT	C	T	14877	14866	14895
Artic_nCoV-2019_50_RIGHT	C	T	15237	15225	15246
Artic_nCoV-2019_50_RIGHT	A	G	15246	15225	15246
Artic_nCoV-2019_50_RIGHT	C	T	15240	15225	15246
Artic_nCoV-2019_50_RIGHT	T	C	15242	15225	15246
Artic_nCoV-2019_51_LEFT	G	A	15181	15172	15193
Artic_nCoV-2019_51_RIGHT	C	T	15559	15539	15560
Artic_nCoV-2019_51_RIGHT	G	T	15543	15539	15560
Artic_nCoV-2019_51_RIGHT	C	T	15540	15539	15560
Artic_nCoV-2019_52_LEFT	C	T	15503	15482	15503
Artic_nCoV-2019_52_RIGHT	C	G	15866	15862	15886
Artic_nCoV-2019_53_LEFT	G	T	15850	15828	15851
Artic_nCoV-2019_53_LEFT	C	T	15848	15828	15851
Artic_nCoV-2019_53_RIGHT	T	C	16203	16187	16209
Artic_nCoV-2019_53_RIGHT	G	T	16188	16187	16209
Artic_nCoV-2019_53_RIGHT	G	T	16197	16187	16209
Artic_nCoV-2019_53_RIGHT	C	T	16192	16187	16209
Artic_nCoV-2019_53_RIGHT	G	T	16206	16187	16209
Artic_nCoV-2019_54_LEFT	G	T	16120	16119	16144
Artic_nCoV-2019_54_RIGHT	T	C	16491	16486	16510
Artic_nCoV-2019_55_RIGHT	C	T	16830	16805	16833
Artic_nCoV-2019_56_LEFT	C	T	16762	16749	16770
Artic_nCoV-2019_56_LEFT	T	C	16752	16749	16770
Artic_nCoV-2019_56_LEFT	C	T	16750	16749	16770
Artic_nCoV-2019_56_RIGHT	A	T	17146	17131	17152
Artic_nCoV-2019_57_LEFT	C	T	17072	17066	17087
Artic_nCoV-2019_57_LEFT	T	A	17075	17066	17087
Artic_nCoV-2019_57_LEFT	A	G	17066	17066	17087
Artic_nCoV-2019_57_LEFT	C	A	17069	17066	17087
Artic_nCoV-2019_57_RIGHT	C	T	17441	17431	17452
Artic_nCoV-2019_57_RIGHT	G	T	17443	17431	17452
Artic_nCoV-2019_57_RIGHT	C	A	17440	17431	17452
Artic_nCoV-2019_58_LEFT	C	T	17397	17382	17406
Artic_nCoV-2019_58_LEFT	C	T	17403	17382	17406
Artic_nCoV-2019_58_RIGHT	C	T	17747	17739	17761
Artic_nCoV-2019_58_RIGHT	C	T	17750	17739	17761
Artic_nCoV-2019_58_RIGHT	C	T	17746	17739	17761
Artic_nCoV-2019_59_LEFT	T	C	17688	17675	17697
Artic_nCoV-2019_59_LEFT	G	T	17679	17675	17697
Artic_nCoV-2019_59_LEFT	T	C	17682	17675	17697
Artic_nCoV-2019_59_LEFT	C	T	17676	17675	17697
Artic_nCoV-2019_59_LEFT	C	T	17690	17675	17697
Artic_nCoV-2019_59_LEFT	A	G	17697	17675	17697
Artic_nCoV-2019_59_RIGHT	C	T	18060	18037	18062
Artic_nCoV-2019_60_LEFT	C	T	17985	17967	17993
Artic_nCoV-2019_60_LEFT	A	G	17993	17967	17993
Artic_nCoV-2019_60_LEFT	C	T	17977	17967	17993
Artic_nCoV-2019_60_RIGHT	C	A	18348	18325	18348
Artic_nCoV-2019_60_RIGHT	T	C	18341	18325	18348
Artic_nCoV-2019_60_RIGHT	C	T	18348	18325	18348
Artic_nCoV-2019_61_LEFT	G	T	18266	18254	18275
Artic_nCoV-2019_61_LEFT	G	T	18255	18254	18275
Artic_nCoV-2019_61_LEFT	C	T	18264	18254	18275
Artic_nCoV-2019_61_LEFT	C	T	18261	18254	18275
Artic_nCoV-2019_61_RIGHT	G	T	18662	18651	18672
Artic_nCoV-2019_61_RIGHT	C	T	18656	18651	18672
Artic_nCoV-2019_61_RIGHT	C	T	18652	18651	18672
Artic_nCoV-2019_61_RIGHT	G	T	18651	18651	18672
Artic_nCoV-2019_62_LEFT	G	A	18615	18597	18618
Artic_nCoV-2019_62_LEFT	T	C	18603	18597	18618
Artic_nCoV-2019_62_RIGHT	G	T	18973	18958	18979
Artic_nCoV-2019_62_RIGHT	A	G	18971	18958	18979
Artic_nCoV-2019_62_RIGHT	G	T	18972	18958	18979
Artic_nCoV-2019_62_RIGHT	C	T	18979	18958	18979
Artic_nCoV-2019_62_RIGHT	T	A	18975	18958	18979
Artic_nCoV-2019_63_LEFT	C	T	18917	18897	18918
Artic_nCoV-2019_63_LEFT	G	T	18907	18897	18918
Artic_nCoV-2019_63_LEFT	C	T	18904	18897	18918
Artic_nCoV-2019_63_LEFT	G	T	18898	18897	18918
Artic_nCoV-2019_63_LEFT	T	G	18918	18897	18918
Artic_nCoV-2019_64_LEFT	C	T	19220	19205	19232
Artic_nCoV-2019_64_RIGHT	G	T	19598	19592	19616
Artic_nCoV-2019_64_RIGHT	T	C	19595	19592	19616
Artic_nCoV-2019_64_RIGHT	A	G	19609	19592	19616
Artic_nCoV-2019_64_RIGHT	T	C	19607	19592	19616
Artic_nCoV-2019_64_RIGHT	C	G	19596	19592	19616
Artic_nCoV-2019_64_RIGHT	T	G	19606	19592	19616
Artic_nCoV-2019_64_RIGHT	A	T	19601	19592	19616
Artic_nCoV-2019_64_RIGHT	T	A	19597	19592	19616
Artic_nCoV-2019_64_RIGHT	C	T	19610	19592	19616
Artic_nCoV-2019_64_RIGHT	C	T	19602	19592	19616
Artic_nCoV-2019_64_RIGHT	T	A	19605	19592	19616
Artic_nCoV-2019_64_RIGHT	C	A	19594	19592	19616
Artic_nCoV-2019_64_RIGHT	A	T	19603	19592	19616
Artic_nCoV-2019_65_LEFT	T	A	19555	19549	19570
Artic_nCoV-2019_65_RIGHT	C	T	19938	19912	19939
Artic_nCoV-2019_65_RIGHT	A	T	19939	19912	19939
Artic_nCoV-2019_65_RIGHT	A	C	19939	19912	19939
Artic_nCoV-2019_66_LEFT	C	T	19854	19845	19866
Artic_nCoV-2019_66_LEFT	C	T	19862	19845	19866
Artic_nCoV-2019_66_LEFT	G	A	19847	19845	19866
Artic_nCoV-2019_67_LEFT	A	T	20193	20173	20200
Artic_nCoV-2019_67_RIGHT	G	A	20568	20543	20572
Artic_nCoV-2019_67_RIGHT	A	G	20553	20543	20572
Artic_nCoV-2019_67_RIGHT	C	T	20555	20543	20572
Artic_nCoV-2019_67_RIGHT	G	T	20569	20543	20572
Artic_nCoV-2019_68_LEFT	A	G	20481	20473	20496
Artic_nCoV-2019_68_LEFT	C	T	20483	20473	20496
Artic_nCoV-2019_68_LEFT	A	C	20473	20473	20496
Artic_nCoV-2019_68_LEFT	T	C	20479	20473	20496
Artic_nCoV-2019_68_RIGHT	G	A	20887	20868	20890
Artic_nCoV-2019_69_LEFT	A	T	20793	20787	20813
Artic_nCoV-2019_69_LEFT	C	T	20801	20787	20813
Artic_nCoV-2019_69_LEFT	C	T	20790	20787	20813
Artic_nCoV-2019_69_LEFT	T	C	20787	20787	20813
Artic_nCoV-2019_69_RIGHT	G	A	21159	21147	21169
Artic_nCoV-2019_69_RIGHT	T	C	21147	21147	21169
Artic_nCoV-2019_69_RIGHT	T	C	21158	21147	21169
Artic_nCoV-2019_69_RIGHT	G	T	21151	21147	21169
Artic_nCoV-2019_70_LEFT	G	T	21088	21076	21104
Artic_nCoV-2019_70_LEFT	C	T	21077	21076	21104
Artic_nCoV-2019_70_LEFT	G	T	21099	21076	21104
Artic_nCoV-2019_70_RIGHT	G	T	21452	21428	21455
Artic_nCoV-2019_70_RIGHT	C	T	21431	21428	21455
Artic_nCoV-2019_71_LEFT	C	T	21380	21358	21386
Artic_nCoV-2019_71_LEFT	C	T	21359	21358	21386
Artic_nCoV-2019_71_LEFT	C	T	21386	21358	21386
Artic_nCoV-2019_71_RIGHT	C	T	21727	21717	21743
Artic_nCoV-2019_71_RIGHT	G	C	21724	21717	21743
Artic_nCoV-2019_71_RIGHT	C	T	21721	21717	21743
Artic_nCoV-2019_71_RIGHT	G	T	21724	21717	21743
Artic_nCoV-2019_71_RIGHT	C	T	21742	21717	21743
Artic_nCoV-2019_72_LEFT	C	T	21676	21659	21682
Artic_nCoV-2019_72_RIGHT	G	T	22030	22014	22038
Artic_nCoV-2019_72_RIGHT	T	C	22032	22014	22038
Artic_nCoV-2019_72_RIGHT	T	C	22020	22014	22038
Artic_nCoV-2019_72_RIGHT	G	T	22017	22014	22038
Artic_nCoV-2019_73_LEFT	T	C	21976	21962	21990
Artic_nCoV-2019_73_LEFT	T	G	21980	21962	21990
Artic_nCoV-2019_73_LEFT	G	C	21974	21962	21990
Artic_nCoV-2019_73_LEFT	G	C	21987	21962	21990
Artic_nCoV-2019_73_LEFT	G	T	21974	21962	21990
Artic_nCoV-2019_73_RIGHT	G	T	22335	22325	22346
Artic_nCoV-2019_73_RIGHT	C	T	22326	22325	22346
Artic_nCoV-2019_73_RIGHT	G	T	22344	22325	22346
Artic_nCoV-2019_73_RIGHT	T	C	22333	22325	22346
Artic_nCoV-2019_73_RIGHT	G	A	22346	22325	22346
Artic_nCoV-2019_73_RIGHT	T	C	22345	22325	22346
Artic_nCoV-2019_74_LEFT	C	T	22264	22263	22290
Artic_nCoV-2019_74_LEFT	G	T	22289	22263	22290
Artic_nCoV-2019_74_LEFT	C	T	22281	22263	22290
Artic_nCoV-2019_74_LEFT	A	C	22280	22263	22290
Artic_nCoV-2019_74_LEFT	C	A	22277	22263	22290
Artic_nCoV-2019_74_LEFT	C	T	22290	22263	22290
Artic_nCoV-2019_74_RIGHT	G	A	22638	22627	22650
Artic_nCoV-2019_75_LEFT	A	T	22524	22517	22542
Artic_nCoV-2019_75_LEFT	C	T	22530	22517	22542
Artic_nCoV-2019_75_RIGHT	T	C	22896	22878	22903
Artic_nCoV-2019_75_RIGHT	G	T	22899	22878	22903
Artic_nCoV-2019_75_RIGHT	C	A	22879	22878	22903
Artic_nCoV-2019_76_LEFT	C	G	22802	22798	22819
Artic_nCoV-2019_76_LEFT	A	C	22803	22798	22819
Artic_nCoV-2019_76_LEFT	A	T	22811	22798	22819
Artic_nCoV-2019_76_LEFT	A	G	22798	22798	22819
Artic_nCoV-2019_76_LEFT_alt3	C	G	22802	22799	22821
Artic_nCoV-2019_76_LEFT_alt3	A	C	22803	22799	22821
Artic_nCoV-2019_76_LEFT_alt3	A	T	22811	22799	22821
Artic_nCoV-2019_76_RIGHT_alt0	C	T	23191	23190	23212
Artic_nCoV-2019_77_LEFT	C	T	23127	23123	23144
Artic_nCoV-2019_77_LEFT	G	T	23126	23123	23144
Artic_nCoV-2019_77_RIGHT	A	T	23503	23501	23522
Artic_nCoV-2019_77_RIGHT	G	T	23501	23501	23522
Artic_nCoV-2019_77_RIGHT	C	T	23520	23501	23522
Artic_nCoV-2019_77_RIGHT	G	C	23522	23501	23522
Artic_nCoV-2019_78_LEFT	C	T	23454	23444	23466
Artic_nCoV-2019_78_LEFT	C	T	23453	23444	23466
Artic_nCoV-2019_78_RIGHT	C	T	23833	23823	23847
Artic_nCoV-2019_78_RIGHT	C	T	23846	23823	23847
Artic_nCoV-2019_79_LEFT	A	G	23801	23790	23812
Artic_nCoV-2019_79_RIGHT	G	A	24164	24146	24169
Artic_nCoV-2019_79_RIGHT	T	C	24152	24146	24169
Artic_nCoV-2019_80_LEFT	G	T	24095	24079	24100
Artic_nCoV-2019_80_LEFT	C	T	24096	24079	24100
Artic_nCoV-2019_80_LEFT	C	T	24099	24079	24100
Artic_nCoV-2019_80_RIGHT	C	T	24444	24444	24467
Artic_nCoV-2019_80_RIGHT	T	C	24450	24444	24467
Artic_nCoV-2019_81_LEFT	T	G	24405	24392	24416
Artic_nCoV-2019_81_LEFT	G	C	24410	24392	24416
Artic_nCoV-2019_81_RIGHT	A	T	24788	24766	24789
Artic_nCoV-2019_82_LEFT	C	T	24700	24697	24721
Artic_nCoV-2019_82_RIGHT	G	C	25064	25053	25076
Artic_nCoV-2019_82_RIGHT	A	G	25067	25053	25076
Artic_nCoV-2019_82_RIGHT	G	T	25062	25053	25076
Artic_nCoV-2019_82_RIGHT	T	C	25070	25053	25076
Artic_nCoV-2019_82_RIGHT	A	G	25060	25053	25076
Artic_nCoV-2019_82_RIGHT	A	G	25056	25053	25076
Artic_nCoV-2019_82_RIGHT	T	C	25068	25053	25076
Artic_nCoV-2019_83_LEFT	C	T	24990	24979	25003
Artic_nCoV-2019_83_LEFT	T	C	24982	24979	25003
Artic_nCoV-2019_83_LEFT	C	A	25000	24979	25003
Artic_nCoV-2019_83_LEFT	C	T	25000	24979	25003
Artic_nCoV-2019_83_LEFT	C	T	25002	24979	25003
Artic_nCoV-2019_83_RIGHT	T	C	25356	25348	25369
Artic_nCoV-2019_83_RIGHT	C	T	25350	25348	25369
Artic_nCoV-2019_83_RIGHT	G	T	25352	25348	25369
Artic_nCoV-2019_83_RIGHT	G	T	25354	25348	25369
Artic_nCoV-2019_84_LEFT	G	A	25297	25280	25301
Artic_nCoV-2019_84_LEFT	C	T	25294	25280	25301
Artic_nCoV-2019_84_LEFT	G	C	25297	25280	25301
Artic_nCoV-2019_84_RIGHT	C	T	25669	25647	25673
Artic_nCoV-2019_84_RIGHT	C	T	25665	25647	25673
Artic_nCoV-2019_84_RIGHT	G	T	25647	25647	25673
Artic_nCoV-2019_84_RIGHT	T	C	25655	25647	25673
Artic_nCoV-2019_84_RIGHT	C	T	25672	25647	25673
Artic_nCoV-2019_84_RIGHT	G	T	25654	25647	25673
Artic_nCoV-2019_84_RIGHT	C	A	25672	25647	25673
Artic_nCoV-2019_84_RIGHT	C	T	25671	25647	25673
Artic_nCoV-2019_84_RIGHT	C	T	25667	25647	25673
Artic_nCoV-2019_84_RIGHT	C	T	25658	25647	25673
Artic_nCoV-2019_85_LEFT	G	A	25618	25602	25623
Artic_nCoV-2019_85_LEFT	C	T	25614	25602	25623
Artic_nCoV-2019_85_LEFT	A	G	25615	25602	25623
Artic_nCoV-2019_85_LEFT	G	T	25606	25602	25623
Artic_nCoV-2019_85_LEFT	T	G	25612	25602	25623
Artic_nCoV-2019_85_LEFT	C	T	25613	25602	25623
Artic_nCoV-2019_85_LEFT	A	G	25616	25602	25623
Artic_nCoV-2019_85_LEFT	C	T	25603	25602	25623
Artic_nCoV-2019_85_LEFT	T	C	25610	25602	25623
Artic_nCoV-2019_85_LEFT	C	T	25611	25602	25623
Artic_nCoV-2019_85_RIGHT	G	A	25993	25970	25994
Artic_nCoV-2019_85_RIGHT	G	T	25971	25970	25994
Artic_nCoV-2019_85_RIGHT	G	T	25979	25970	25994
Artic_nCoV-2019_85_RIGHT	T	C	25975	25970	25994
Artic_nCoV-2019_85_RIGHT	A	C	25980	25970	25994
Artic_nCoV-2019_86_LEFT	C	T	25916	25903	25924
Artic_nCoV-2019_86_LEFT	G	T	25909	25903	25924
Artic_nCoV-2019_86_LEFT	C	T	25919	25903	25924
Artic_nCoV-2019_86_LEFT	A	T	25905	25903	25924
Artic_nCoV-2019_86_LEFT	T	C	25911	25903	25924
Artic_nCoV-2019_86_LEFT	C	T	25904	25903	25924
Artic_nCoV-2019_86_LEFT	A	G	25910	25903	25924
Artic_nCoV-2019_86_LEFT	G	T	25906	25903	25924
Artic_nCoV-2019_86_RIGHT	T	C	26294	26291	26315
Artic_nCoV-2019_86_RIGHT	T	C	26301	26291	26315
Artic_nCoV-2019_86_RIGHT	T	G	26301	26291	26315
Artic_nCoV-2019_86_RIGHT	G	T	26308	26291	26315
Artic_nCoV-2019_86_RIGHT	C	T	26313	26291	26315
Artic_nCoV-2019_87_LEFT	C	T	26198	26198	26219
Artic_nCoV-2019_87_LEFT	C	T	26204	26198	26219
Artic_nCoV-2019_87_LEFT	T	C	26202	26198	26219
Artic_nCoV-2019_87_LEFT	T	A	26210	26198	26219
Artic_nCoV-2019_87_LEFT	G	T	26211	26198	26219
Artic_nCoV-2019_87_LEFT	G	T	26199	26198	26219
Artic_nCoV-2019_87_RIGHT	C	T	26570	26567	26590
Artic_nCoV-2019_88_LEFT	G	T	26526	26521	26542
Artic_nCoV-2019_88_LEFT	C	T	26533	26521	26542
Artic_nCoV-2019_88_LEFT	G	T	26529	26521	26542
Artic_nCoV-2019_88_LEFT	C	A	26537	26521	26542
Artic_nCoV-2019_88_LEFT	C	T	26527	26521	26542
Artic_nCoV-2019_88_LEFT	A	G	26530	26521	26542
Artic_nCoV-2019_88_RIGHT	C	T	26894	26891	26913
Artic_nCoV-2019_88_RIGHT	C	T	26907	26891	26913
Artic_nCoV-2019_88_RIGHT	C	T	26895	26891	26913
Artic_nCoV-2019_89_LEFT	G	T	26840	26836	26857
Artic_nCoV-2019_89_LEFT	C	T	26854	26836	26857
Artic_nCoV-2019_89_LEFT_alt2	G	T	26840	26839	26860
Artic_nCoV-2019_89_LEFT_alt2	C	T	26854	26839	26860
Artic_nCoV-2019_89_LEFT_alt2	C	T	26858	26839	26860
Artic_nCoV-2019_89_RIGHT	G	A	27225	27203	27227
Artic_nCoV-2019_89_RIGHT	C	A	27213	27203	27227
Artic_nCoV-2019_89_RIGHT	G	T	27217	27203	27227
Artic_nCoV-2019_89_RIGHT	G	T	27225	27203	27227
Artic_nCoV-2019_89_RIGHT	G	T	27226	27203	27227
Artic_nCoV-2019_89_RIGHT	G	T	27214	27203	27227
Artic_nCoV-2019_89_RIGHT	C	T	27213	27203	27227
Artic_nCoV-2019_89_RIGHT	C	T	27208	27203	27227
Artic_nCoV-2019_89_RIGHT	T	C	27222	27203	27227
Artic_nCoV-2019_89_RIGHT	T	C	27205	27203	27227
Artic_nCoV-2019_89_RIGHT_alt4	C	A	27213	27191	27215
Artic_nCoV-2019_89_RIGHT_alt4	A	G	27198	27191	27215
Artic_nCoV-2019_89_RIGHT_alt4	G	T	27214	27191	27215
Artic_nCoV-2019_89_RIGHT_alt4	A	G	27200	27191	27215
Artic_nCoV-2019_89_RIGHT_alt4	C	T	27213	27191	27215
Artic_nCoV-2019_89_RIGHT_alt4	C	T	27208	27191	27215
Artic_nCoV-2019_89_RIGHT_alt4	G	T	27201	27191	27215
Artic_nCoV-2019_89_RIGHT_alt4	T	C	27205	27191	27215
Artic_nCoV-2019_90_LEFT	G	T	27163	27142	27164
Artic_nCoV-2019_90_LEFT	G	C	27147	27142	27164
Artic_nCoV-2019_90_LEFT	G	T	27147	27142	27164
Artic_nCoV-2019_90_RIGHT	T	C	27522	27512	27533
Artic_nCoV-2019_90_RIGHT	A	G	27525	27512	27533
Artic_nCoV-2019_90_RIGHT	C	T	27524	27512	27533
Artic_nCoV-2019_90_RIGHT	C	T	27532	27512	27533
Artic_nCoV-2019_90_RIGHT	C	G	27519	27512	27533
Artic_nCoV-2019_90_RIGHT	C	T	27513	27512	27533
Artic_nCoV-2019_90_RIGHT	G	T	27514	27512	27533
Artic_nCoV-2019_90_RIGHT	A	G	27515	27512	27533
Artic_nCoV-2019_91_LEFT	A	T	27468	27447	27471
Artic_nCoV-2019_91_RIGHT	T	C	27829	27826	27854
Artic_nCoV-2019_92_LEFT	G	T	27798	27785	27808
Artic_nCoV-2019_92_LEFT	C	T	27804	27785	27808
Artic_nCoV-2019_92_LEFT	G	A	27806	27785	27808
Artic_nCoV-2019_92_LEFT	C	T	27807	27785	27808
Artic_nCoV-2019_92_LEFT	C	T	27791	27785	27808
Artic_nCoV-2019_92_LEFT	G	T	27806	27785	27808
Artic_nCoV-2019_92_RIGHT	T	C	28151	28146	28172
Artic_nCoV-2019_92_RIGHT	C	T	28153	28146	28172
Artic_nCoV-2019_93_RIGHT	G	T	28460	28443	28464
Artic_nCoV-2019_93_RIGHT	G	C	28451	28443	28464
Artic_nCoV-2019_93_RIGHT	G	A	28457	28443	28464
Artic_nCoV-2019_94_LEFT	G	T	28396	28395	28416
Artic_nCoV-2019_94_LEFT	C	T	28399	28395	28416
Artic_nCoV-2019_94_LEFT	C	T	28409	28395	28416
Artic_nCoV-2019_94_LEFT	G	A	28396	28395	28416
Artic_nCoV-2019_95_LEFT	G	A	28682	28678	28699
Artic_nCoV-2019_96_LEFT	A	G	28990	28986	29007
Artic_nCoV-2019_96_LEFT	A	G	28989	28986	29007
Artic_nCoV-2019_96_RIGHT	C	T	29367	29357	29378
Artic_nCoV-2019_97_LEFT	A	G	29297	29289	29316
Artic_nCoV-2019_97_LEFT	C	T	29296	29289	29316
Artic_nCoV-2019_97_RIGHT	T	C	29667	29666	29693
