# Supplementary material for: SARS-CoV-2 genomic diversity and the implications for qRT-PCR diagnostics and transmission
Source: HighWire-hosted journal article supplement (doi:10.1101/gr.268961.120), 2021-02-18
Supplement: Supplemental_File_S3.xlsx [file Supplemental_File_S3.xlsx]

## Sheet: Sheet1
Supplemental File S3: A table describing how many samples from each dataset were used for each of the preformed analyses.
		Samples filtered out		Analyses (Figures)
Sample group	Sample count	High Ct samples	Low read count samples	SV analysis (Figure 1)	Mutational profiles (Figure 2)	Co-occurrence analyses (Figure 3)	Probe/primer analyses (Figure 4)	Transmission analyses (Figure 5)
NYC (Weill Cornell)	140	5	16	119	119	119	119	119
Houston (BCM)	10	0	0	10	10	10	10	0
NYC (NYU Langone)	147	0	0	0	147	147	147	0
SARS-CoV-1	43	0	0	0	43	0	0	0
MERS	53	0	0	0	53	0	0	0
	393	5	16	129	372	129	276	119	Total
